# Supplementary material
Source: MDPI journal article supplement (https://www.mdpi.com/2073-4433/13/10/1696)
Supplement: s1 [file s1]

# Supplementary Materials: PM<sub>2.5</sub> Pollution in Six Major Chinese Urban Agglomerations: Spatiotemporal Variations, Health Impacts, and the Relationships with Meteorological Conditions

Zhuofan Li <sup>1,2,\*</sup>, Xiangmin Zhang <sup>1,2,3</sup>, Xiaoyong Liu <sup>3,4</sup> and Bin Yu <sup>1,2</sup>

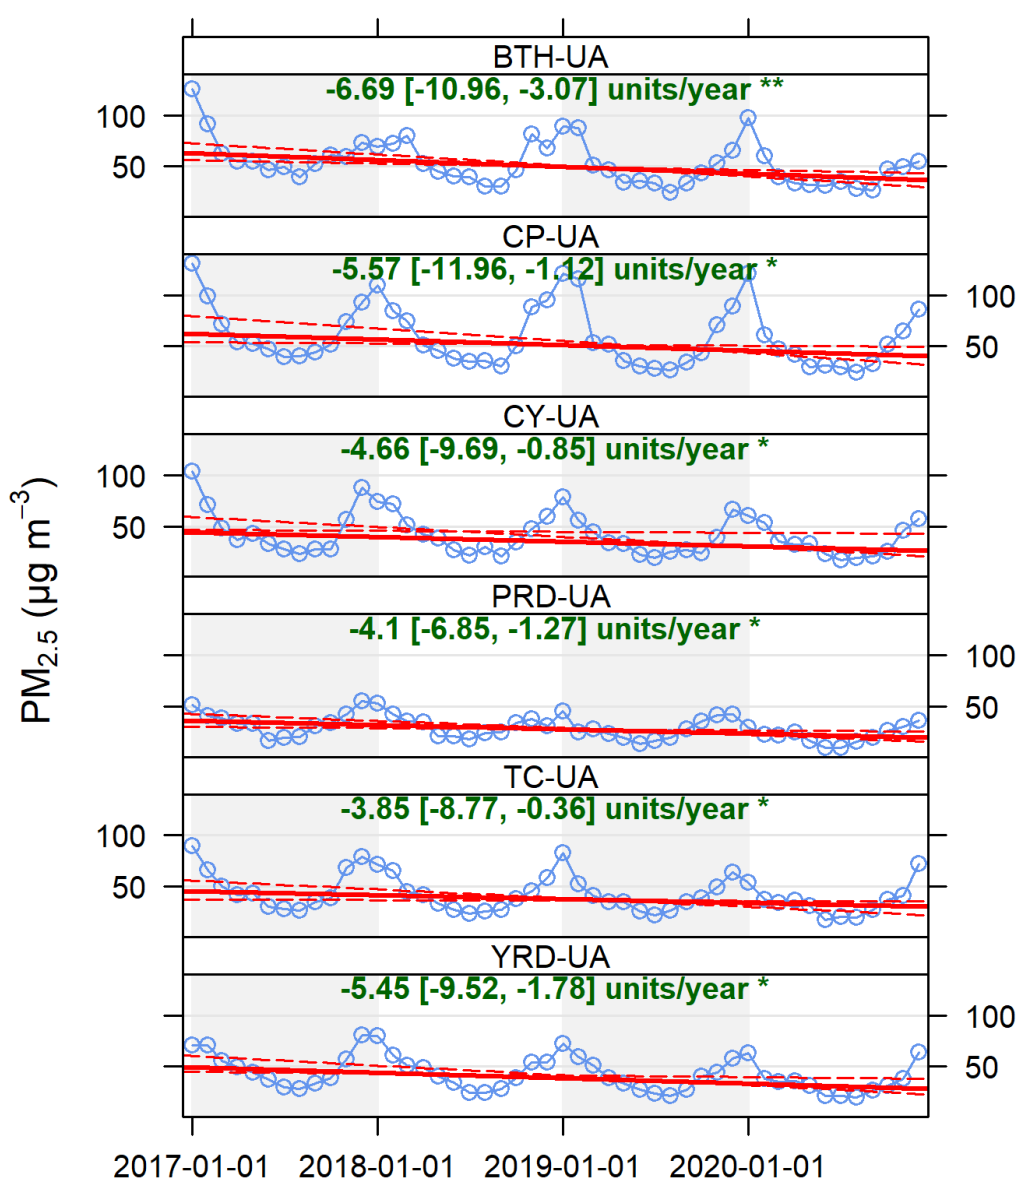

**Figure S1.** The variation trend of PM<sub>2.5</sub> in six regions by using Theil-Sen estimates from 2017 to 2020. Beijing-Tianjin-Hebei urban agglomeration (BTH-UA), Central Plains urban agglomeration (CP-UA), Yangtze River Delta urban agglomeration (YRD-UA), Triangle of Central China urban agglomeration (TC-UA), Chengdu-Chongqing urban agglomeration (CY-UA), and Pearl River Delta urban agglomeration (PRD-UA).

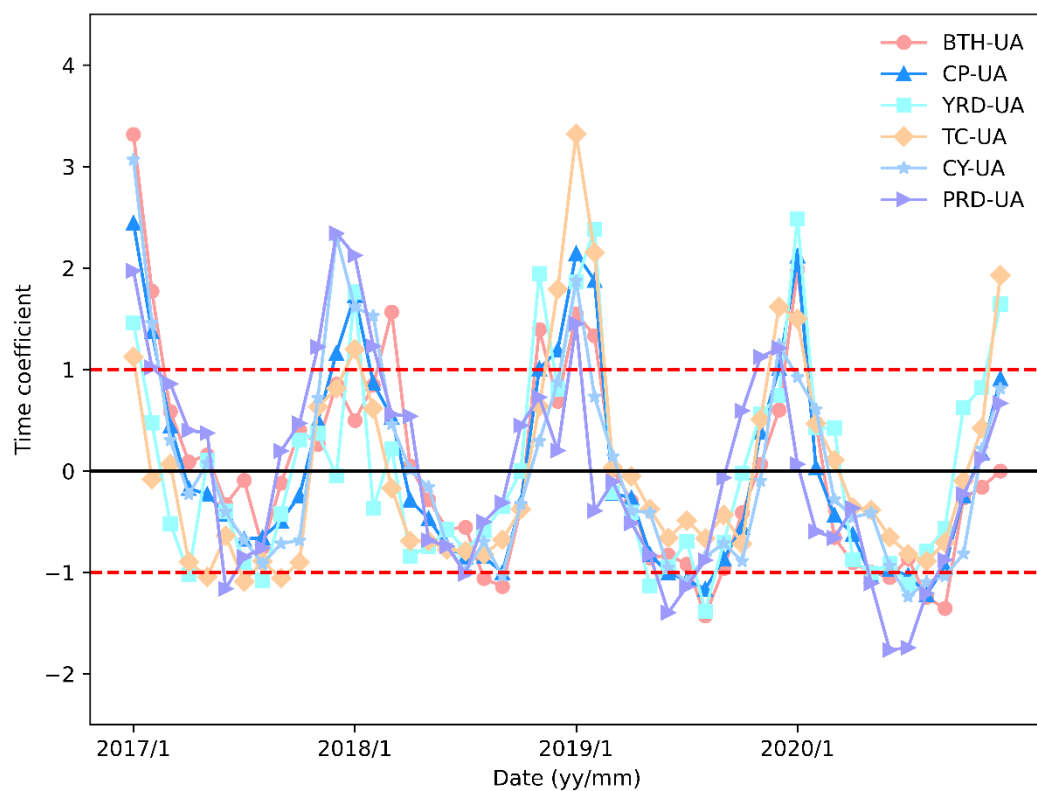

**Figure S2.** PM<sub>2.5</sub> time coefficients decomposed by empirical orthogonal function in six urban agglomerations from 2017 to 2020.

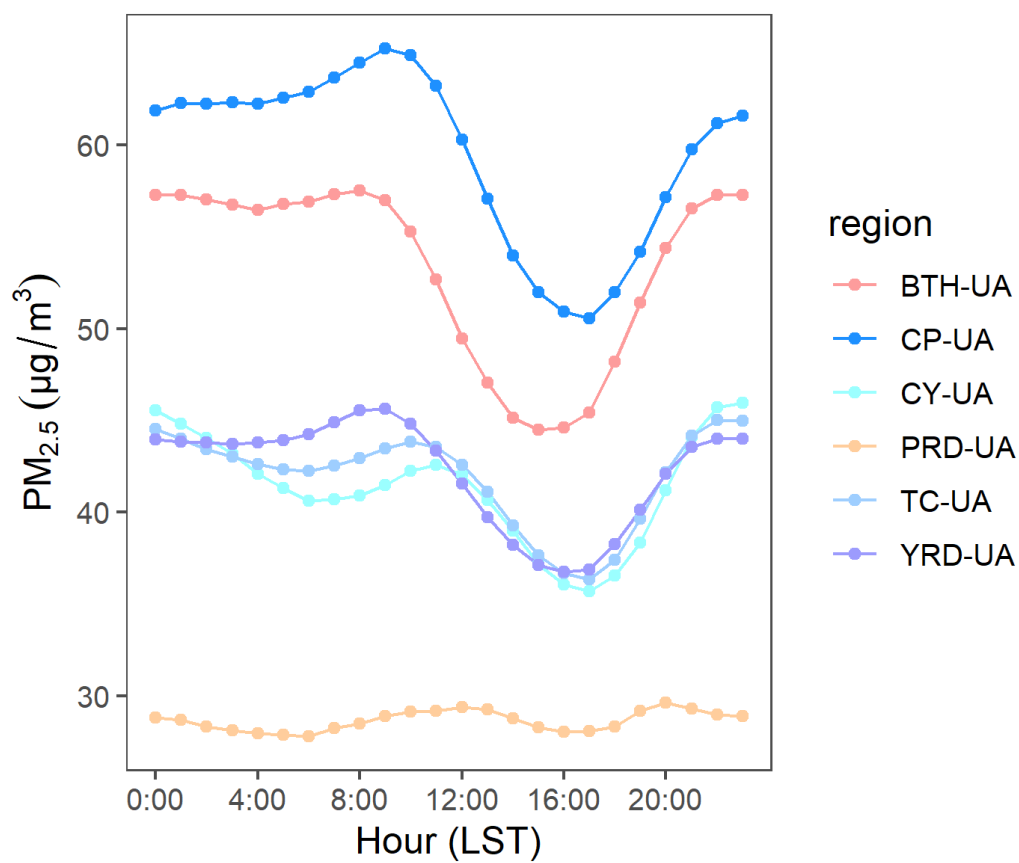

**Figure S3.** Diurnal variations of PM<sub>2.5</sub> concentrations in six urban agglomerations from 2017 to 2020.

**Table S1.** Parameters of standard deviation ellipse of yearly mean concentrations of PM<sub>2.5</sub> in six urban agglomerations from 2017 to 2020.

| Region | Parameters           | Year              |                   |                   |                   |
|--------|----------------------|-------------------|-------------------|-------------------|-------------------|
|        |                      | 2017              | 2018              | 2019              | 2020              |
| BTH-UA | azimuth/degree       | 48.53             | 48.55             | 49.19             | 49.11             |
|        | mean center          | 116.09°E, 38.71°N | 116.12°E, 38.76°N | 116.15°E, 38.75°N | 116.17°E, 38.77°N |
|        | major axes/km        | 243.2             | 244.6             | 248.6             | 246.5             |
|        | minor axes/km        | 109.8             | 111.8             | 110.5             | 110.9             |
|        | area/km <sup>2</sup> | 83859             | 85917             | 86278             | 85901             |
| CP-UA  | azimuth/degree       | 76.13             | 76.06             | 74.94             | 75.08             |
|        | mean center          | 113.78°E, 34.71°N | 113.79°E, 34.66°N | 113.78°E, 34.67°N | 113.80°E, 34.69°N |
|        | major axes/km        | 183.9             | 182.2             | 184.4             | 184.2             |
|        | minor axes/km        | 164.4             | 165.0             | 163.2             | 162.9             |
|        | area/km <sup>2</sup> | 94962             | 94452             | 94559             | 94257             |
| YRD-UA | azimuth/degree       | 136.88            | 136.38            | 136.17            | 135.96            |
|        | mean center          | 118.65°E, 31.76°N | 118.70°E, 31.81°N | 118.69°E, 31.79°N | 118.66°E, 31.84°N |
|        | major axes/km        | 290.3             | 285.7             | 285.8             | 288.6             |
|        | minor axes/km        | 171.2             | 170.4             | 171.2             | 171.6             |
|        | area/km <sup>2</sup> | 156127            | 152915            | 153705            | 155544            |
| TC-UA  | azimuth/degree       | 98.45             | 98.31             | 96.13             | 95.94             |
|        | mean center          | 114.06°E, 29.00°N | 113.99°E, 29.01°N | 113.93°E, 29.00°N | 113.96°E, 29.00°N |
|        | major axes/km        | 243.1             | 242.1             | 242.7             | 243.2             |

|        |                      |                   |                      |                      |                   |
|--------|----------------------|-------------------|----------------------|----------------------|-------------------|
|        | minor axes/km        | 205.2             | 205.8                | 204.4                | 205.1             |
|        | area/km <sup>2</sup> | 156662            | 156527               | 155867               | 156662            |
| CY-UA  | azimuth/degree       | 62.28             | 63.17                | 64.16                | 63.22             |
|        | mean center          | 104.93°E, 30.14°N | 104.88°E,<br>30.14°N | 104.88°E,<br>30.11°N | 104.86°E, 30.10°N |
|        | major axes/km        | 176.2             | 179.2                | 176.4                | 172.7             |
|        | minor axes/km        | 129.8             | 129.2                | 130.4                | 131.7             |
|        | area/km <sup>2</sup> | 71838             | 72740                | 72287                | 71436             |
|        | azimuth/degree       | 93.08             | 93.83                | 93.11                | 91.97             |
| PRD-UA | mean center          | 113.33°E, 22.88°N | 113.34°E,<br>22.89°N | 113.36°E,<br>22.89°N | 113.37°E, 22.89°N |
|        | major axes/km        | 98.9              | 99.5                 | 99.1                 | 99.4              |
|        | minor axes/km        | 71.0              | 70.8                 | 70.5                 | 70.6              |
|        | area/km <sup>2</sup> | 22073             | 22116                | 21964                | 22039             |
|        |                      |                   |                      |                      |                   |
